# Supplementary material for: A Comparative Analysis of Influenza Vaccination Programs
Source: PLOS journal article supplement (doi:10.1371/journal.pmed.0030387), 2006-09-28
Supplement: S3 (10.1371/journal.pmed.0030387.s003) [file journal.pmed.0030387.s003]

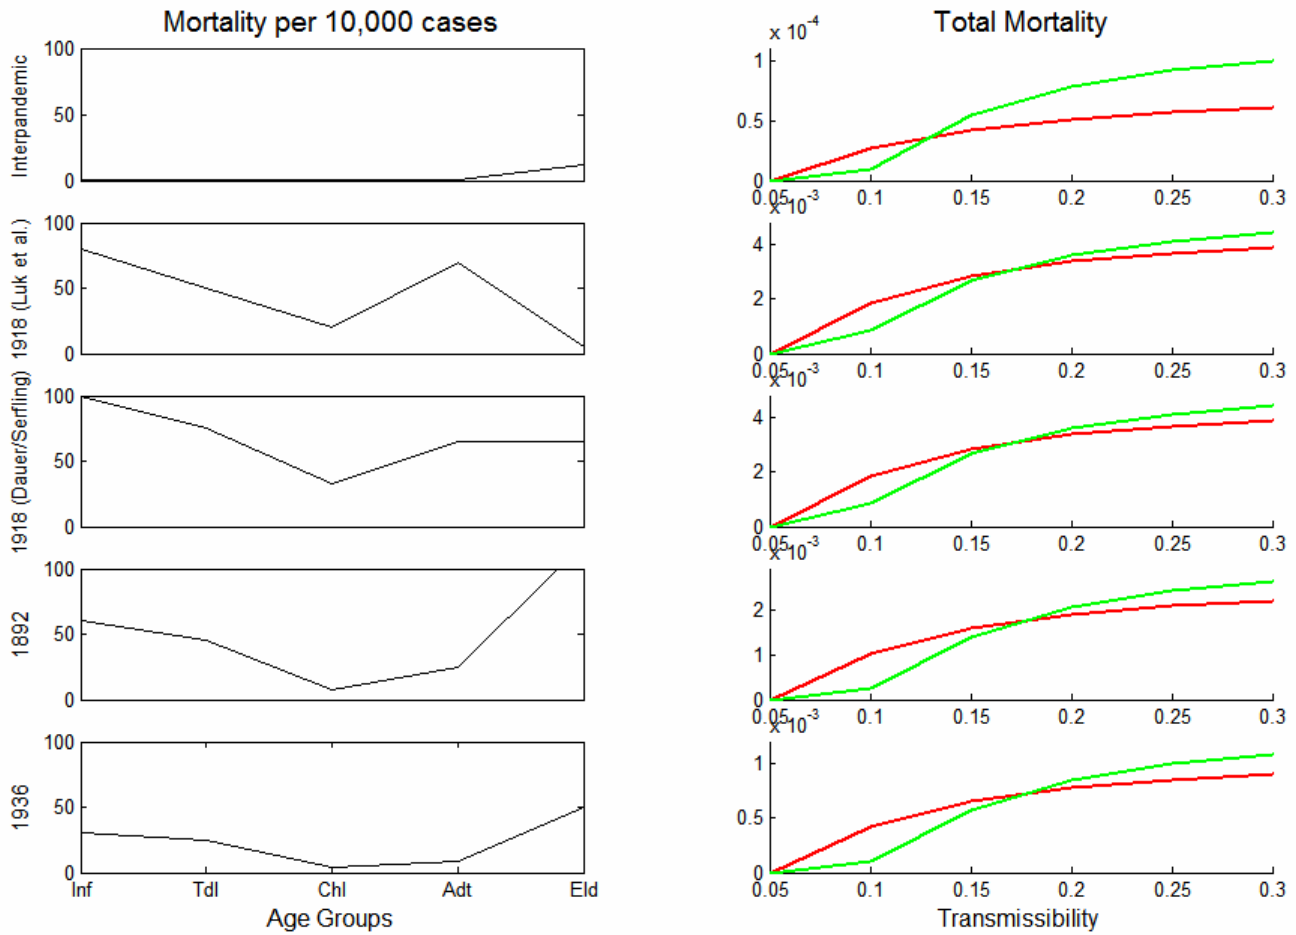

Figure S3: Epidemiological predictions for five different estimated influenza mortality distributions. Left: Mortality rates estimated for various influenza epidemics and pandemics [S8, S11, S12]. The top two distributions are considered in the main text. Right: Total mortality predicted for the mortality-based strategy (red) and morbidity-based strategy (green) assuming the corresponding distributions of mortality rates.
