# Supplementary material for: A Comparative Analysis of Influenza Vaccination Programs
Source: PLOS journal article supplement (doi:10.1371/journal.pmed.0030387), 2006-09-28
Supplement: S5 (10.1371/journal.pmed.0030387.s005) [file journal.pmed.0030387.s005]

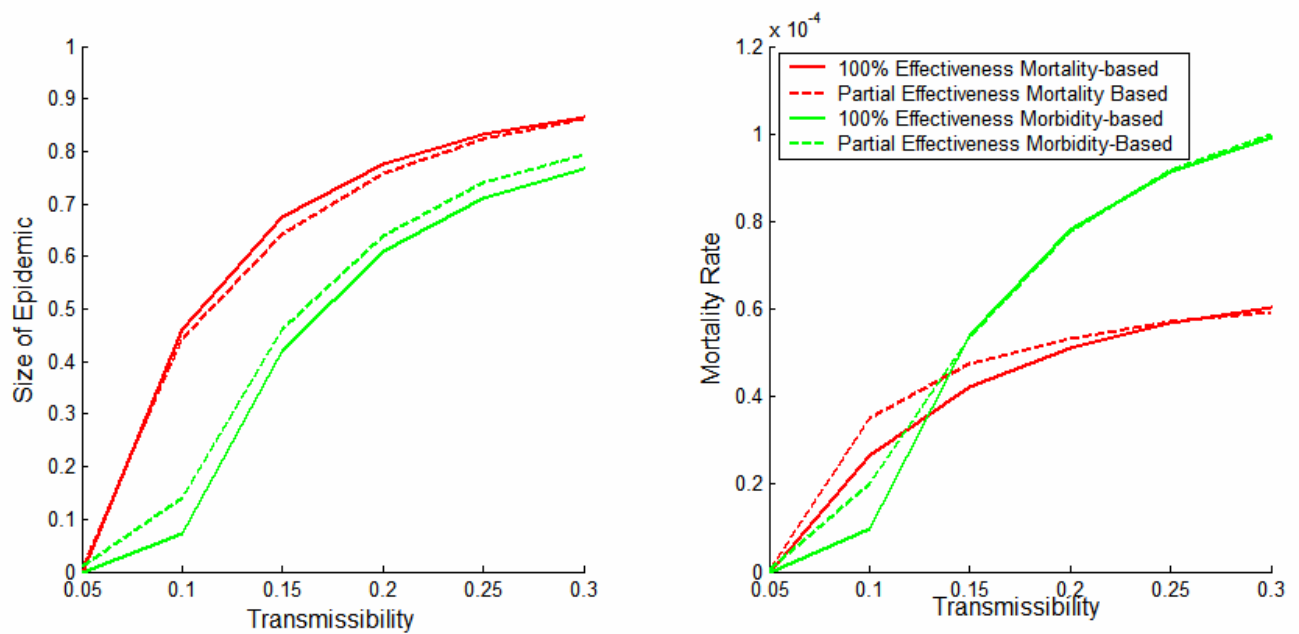

Figure S5: Results from simulation demonstrate that the two methods of modeling vaccine efficacy give similar results. Results are shown for the mortality-based and morbidity-based strategies. ‘Partial effectiveness’ refers to the vaccination of a proportion  $C$  of the population with effectiveness  $E$ . ‘100% effectiveness’ refers to the vaccination of a proportion  $C * E$  of the population with effectiveness 1.
